# Supplementary material for: Green Deep Eutectic Solvents for Microwave-Assisted Biomass Delignification and Valorisation
Source: Molecules. 2021 Feb 4;26(4):798. doi: 10.3390/molecules26040798 (PMC7913847; doi:10.3390/molecules26040798)
Supplement: Supplementary file 1 [file molecules-26-00798-s001.pdf]

## SUPPORTING INFO

### Dielectric Properties of Deep Eutectic Solvents (NaDES and LigDES)

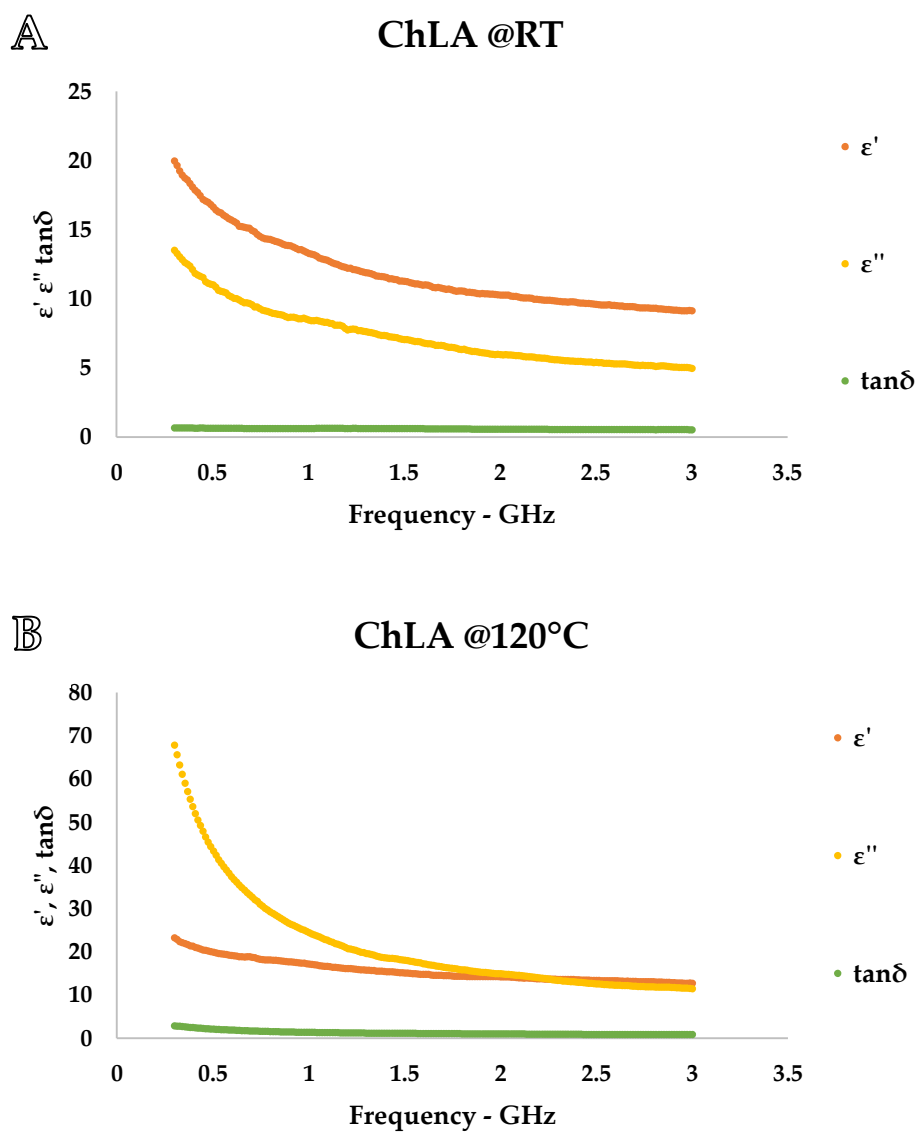

**Figure S1:** ChLA dielectric properties. Irradiation frequency range: 0.3-3 GHz. Irradiation temperature: A. RT; B. 120 °C. Measurements were performed according to Paragraph 3.3 in the Experimental Section.

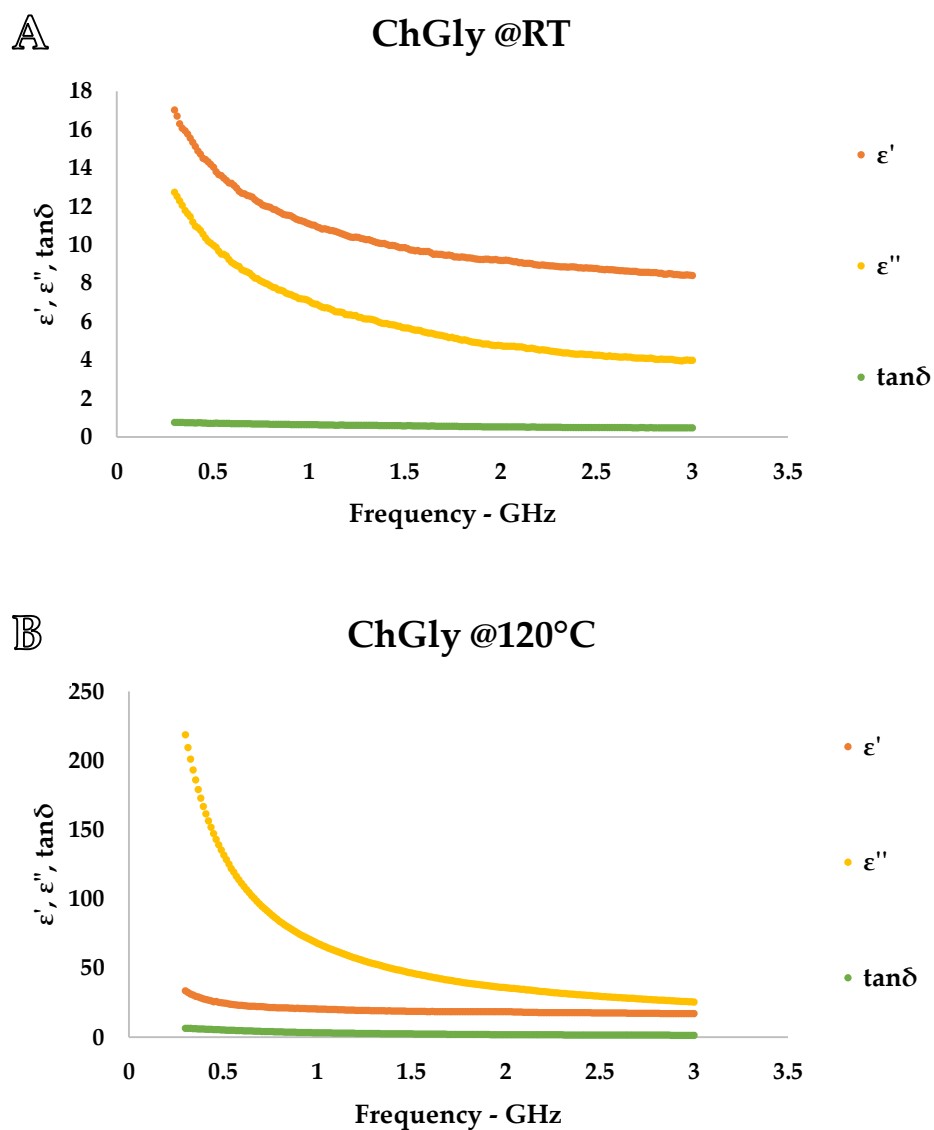

**Figure S2:** ChGly dielectric properties. Irradiation frequency range: 0.3-3 GHz. Irradiation temperature: A. RT; B. 120 °C. Measurements were performed according to Paragraph 3.3 in the Experimental Section.

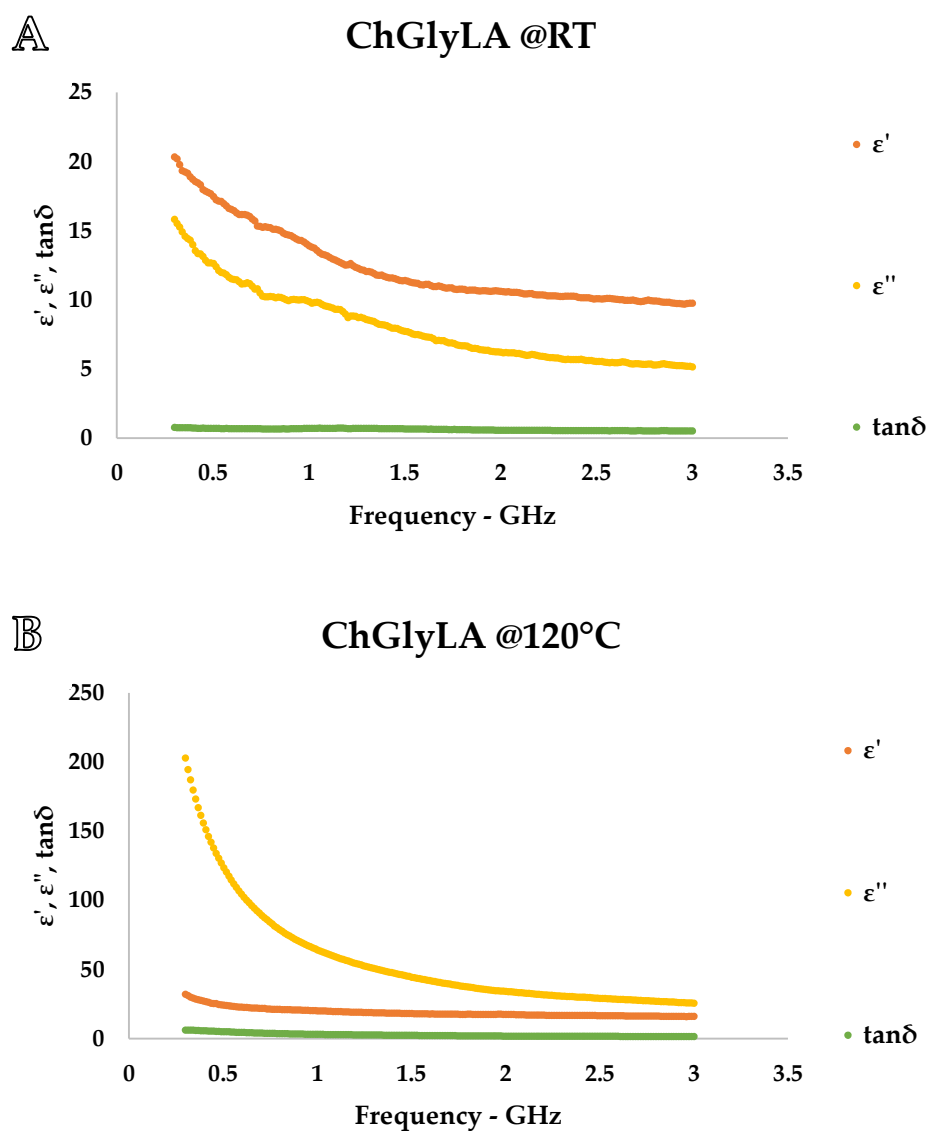

**Figure S3:** ChGlyLA dielectric properties. Irradiation frequency range: 0.3-3 GHz. Irradiation temperature: A. RT; B. 120 °C. Measurements were performed according to Paragraph 3.3 in the Experimental Section.

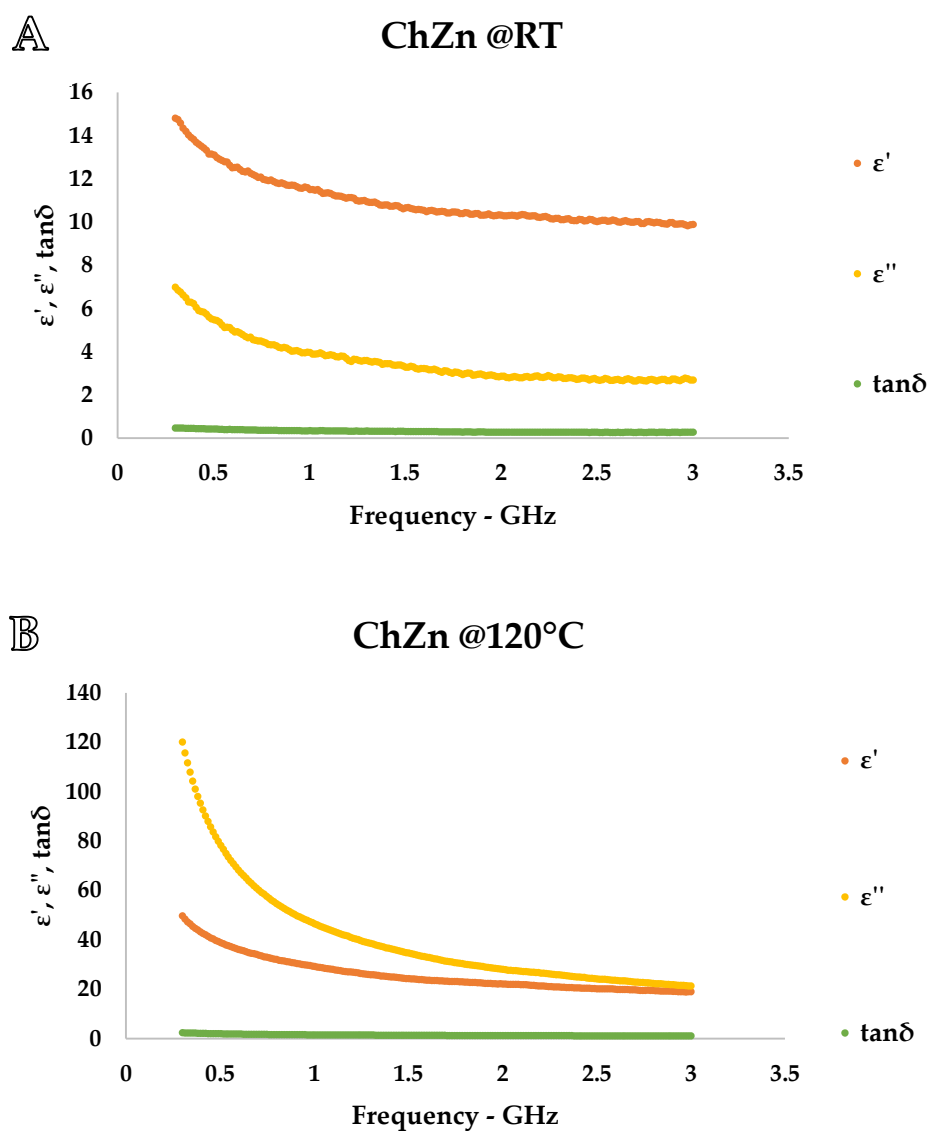

**Figure S4:** ChZn dielectric properties. Irradiation frequency range: 0.3-3 GHz. Irradiation temperature: A. RT; B. 120 °C. Measurements were performed according to Paragraph 3.3 in the Experimental Section.

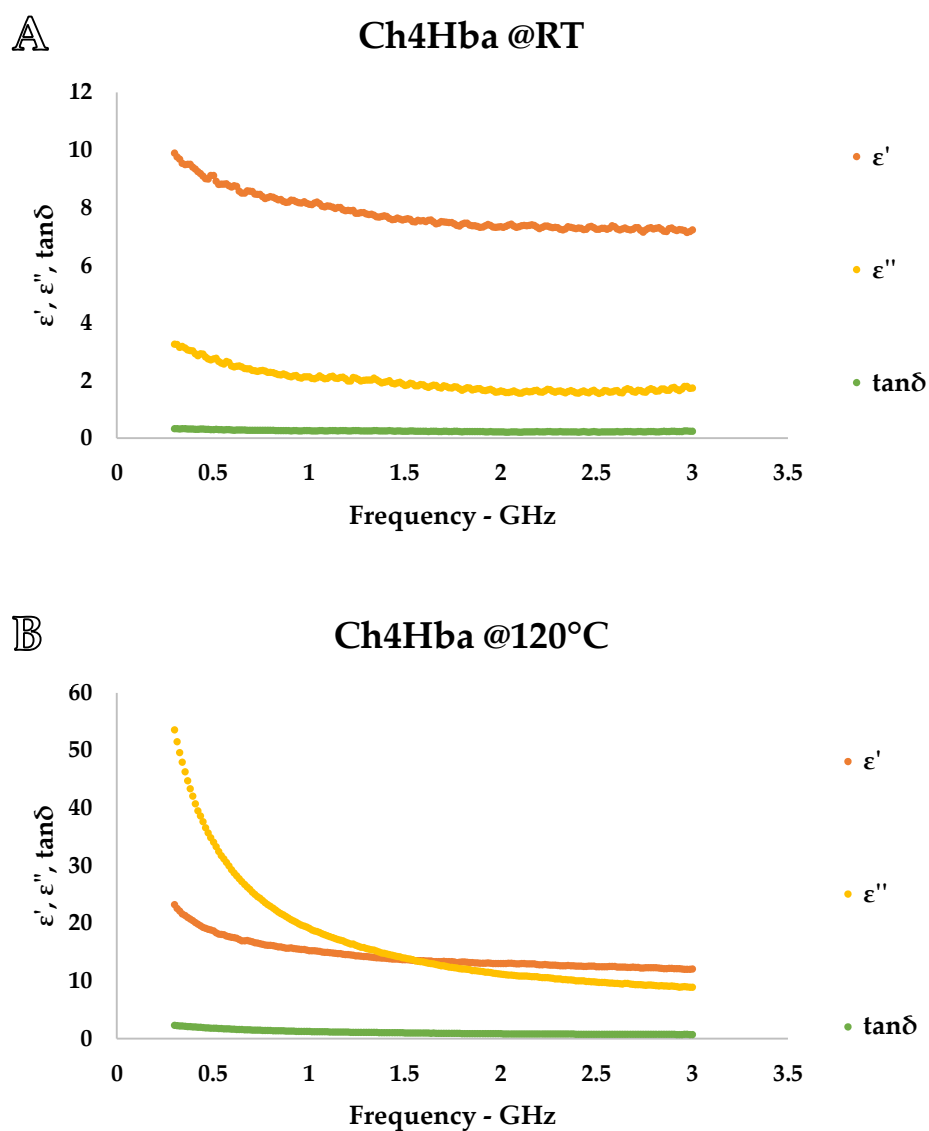

**Figure S5:** Ch4Hba dielectric properties. Irradiation frequency range: 0.3-3 GHz. Irradiation temperature: A. RT; B. 120 °C. Measurements were performed according to Paragraph 3.3 in the Experimental Section.

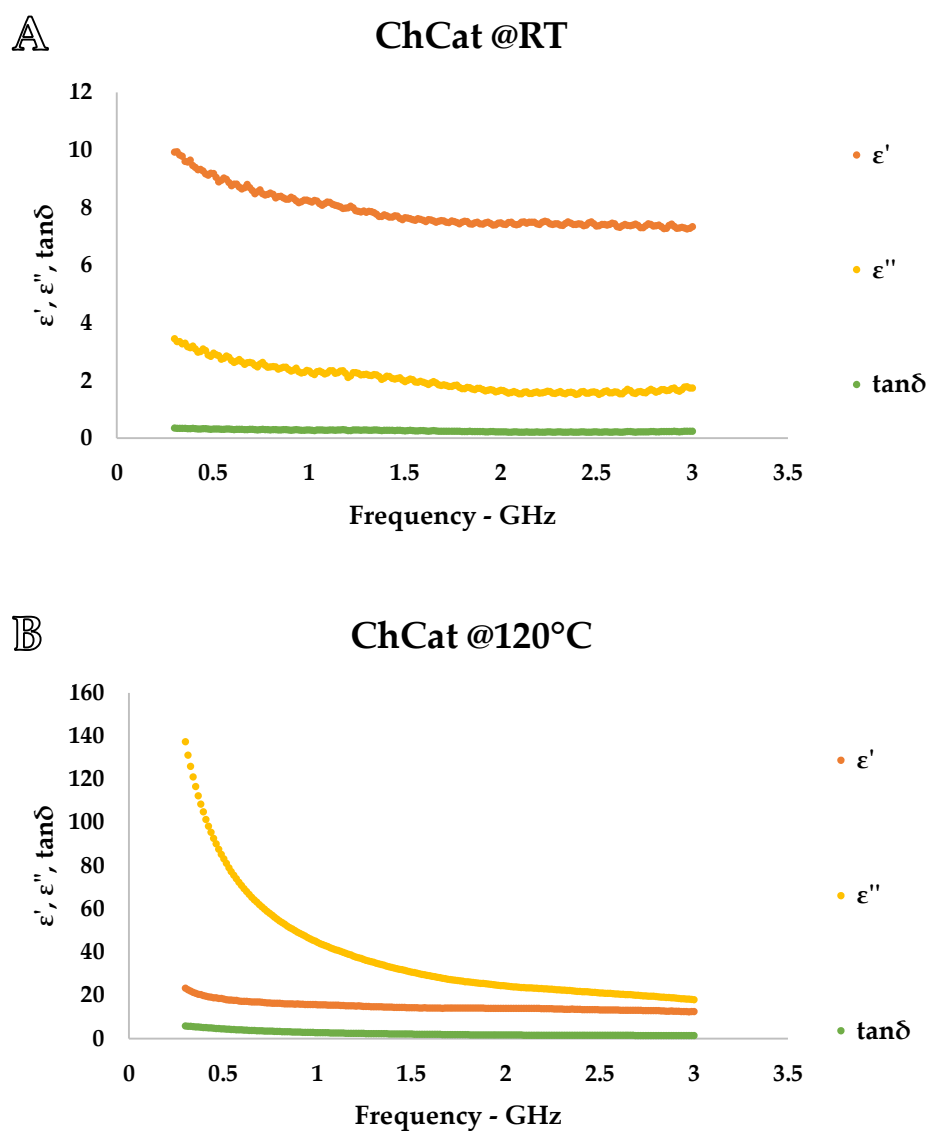

**Figure S6:** ChCat dielectric properties. Irradiation frequency range: 0.3-3 GHz. Irradiation temperature: A. RT; B. 120 °C. Measurements were performed according to Paragraph 3.3 in the Experimental Section.

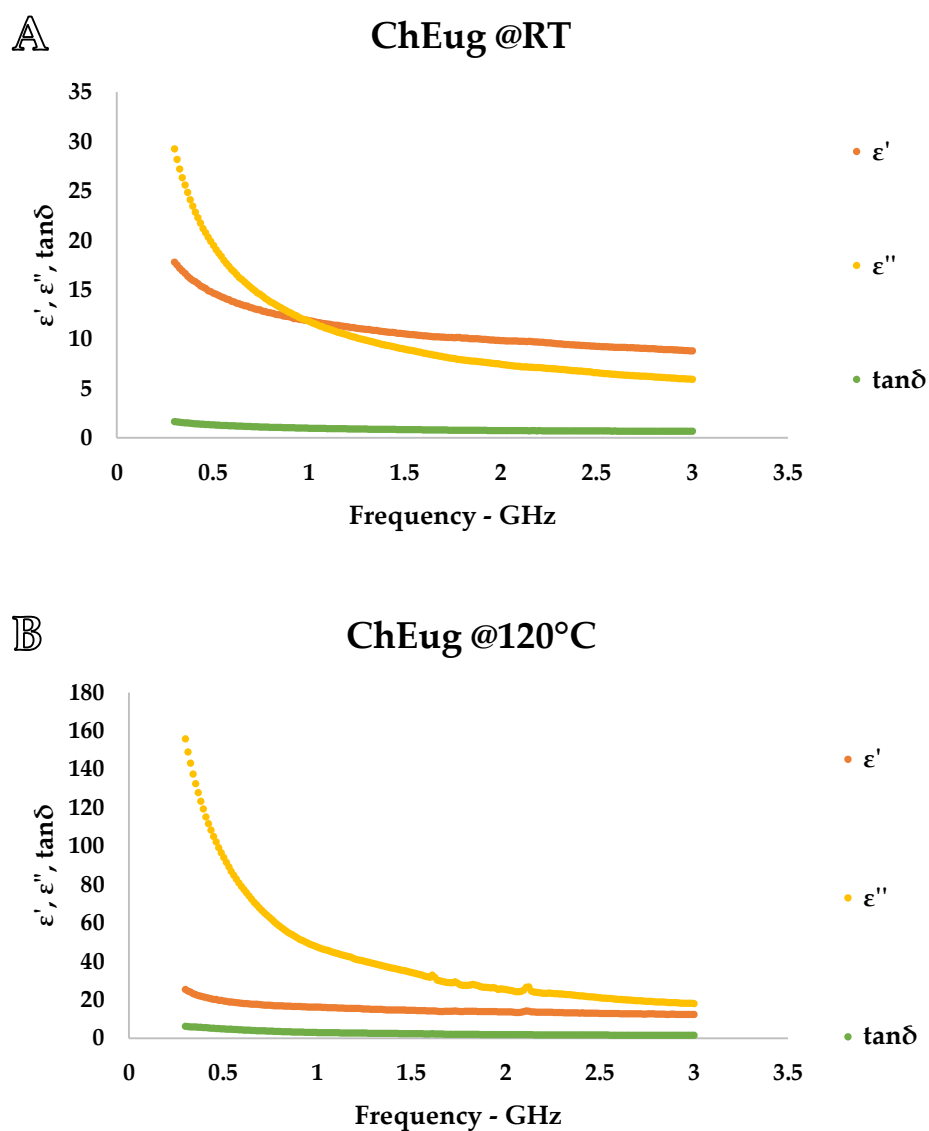

**Figure S7:** ChEug dielectric properties. Irradiation frequency range: 0.3-3 GHz. Irradiation temperature: A. RT; B. 120 °C. Measurements were performed according to Paragraph 3.3 in the Experimental Section.

# Wheat straw Characterization

Table S1: WS biomass characterization, NREL method. [1]

| Ash<br>(%, DM) | Extractives<br>(%, DM) | Carbohydrates (%, DM) | Lignin (%, DM) |              |      |
|----------------|------------------------|-----------------------|----------------|--------------|------|
|                |                        | TOT                   | Acid<br>insol. | Acid<br>sol. | TOT  |
| 8.5            | 0.69                   | 73.2                  | 20.6           | 1.2          | 21.8 |

## Antioxidant Activity of LigDES

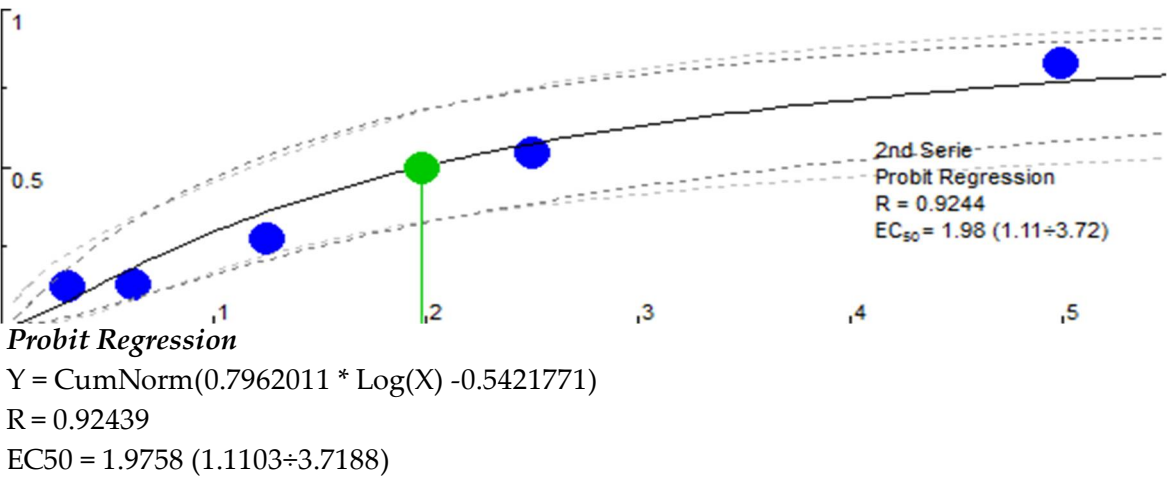

Figure S8: Ch4Hba “as synthesized” DPPH essay. Probit regression, relative equation and EC50 value. Measurements were performed according to Paragraph 3.6 in the Experimental Section.

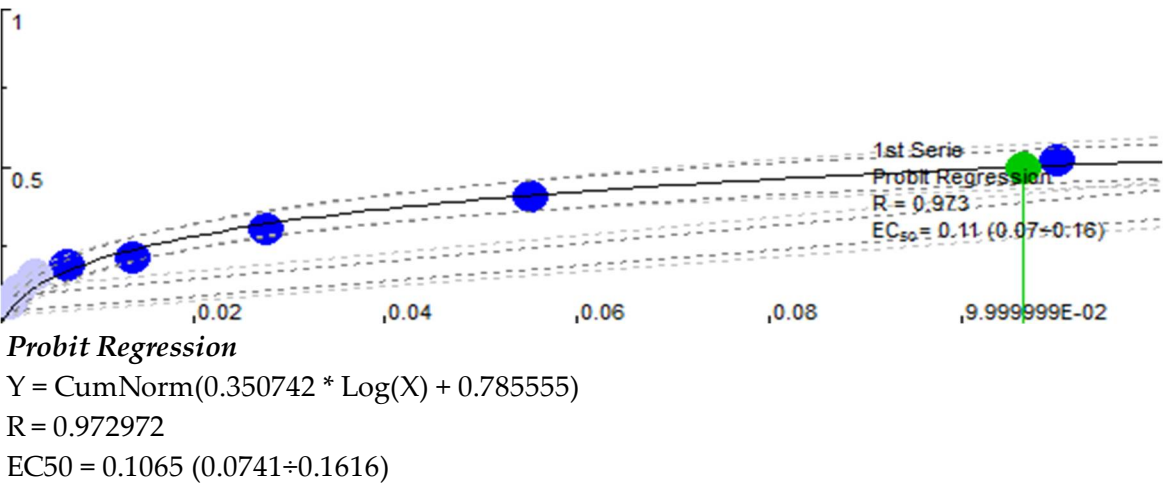

Figure S9: ChCat “as synthesized” DPPH essay. Probit regression, relative equation and EC50 value. Measurements were performed according to Paragraph 3.6 in the Experimental Section.

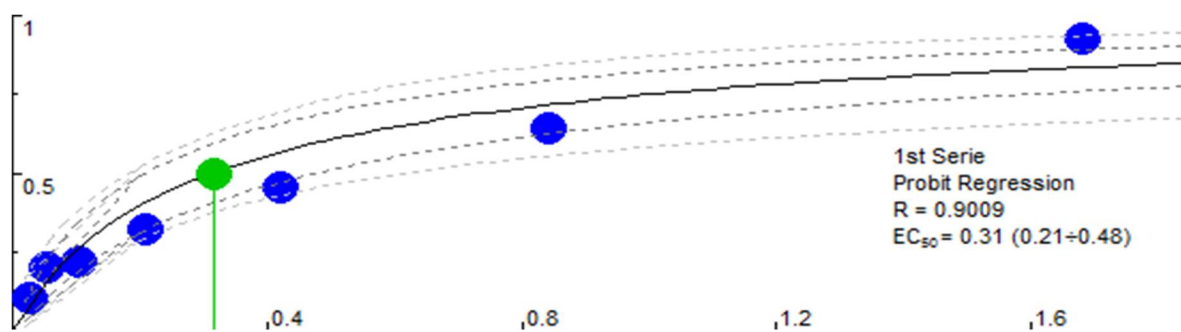

### *Probit Regression*

$$Y = \text{CumNorm}(0.58189 * \text{Log}(X) + 0.67258)$$

$$R = 0.900917$$

$$\text{EC}_{50} = 0.3148 (0.2094 \div 0.4774)$$

**Figure S10:** ChEug “as synthesized” DPPH essay. Probit regression, relative equation and EC50 value. Measurements were performed according to Paragraph 3.6 in the Experimental Section.

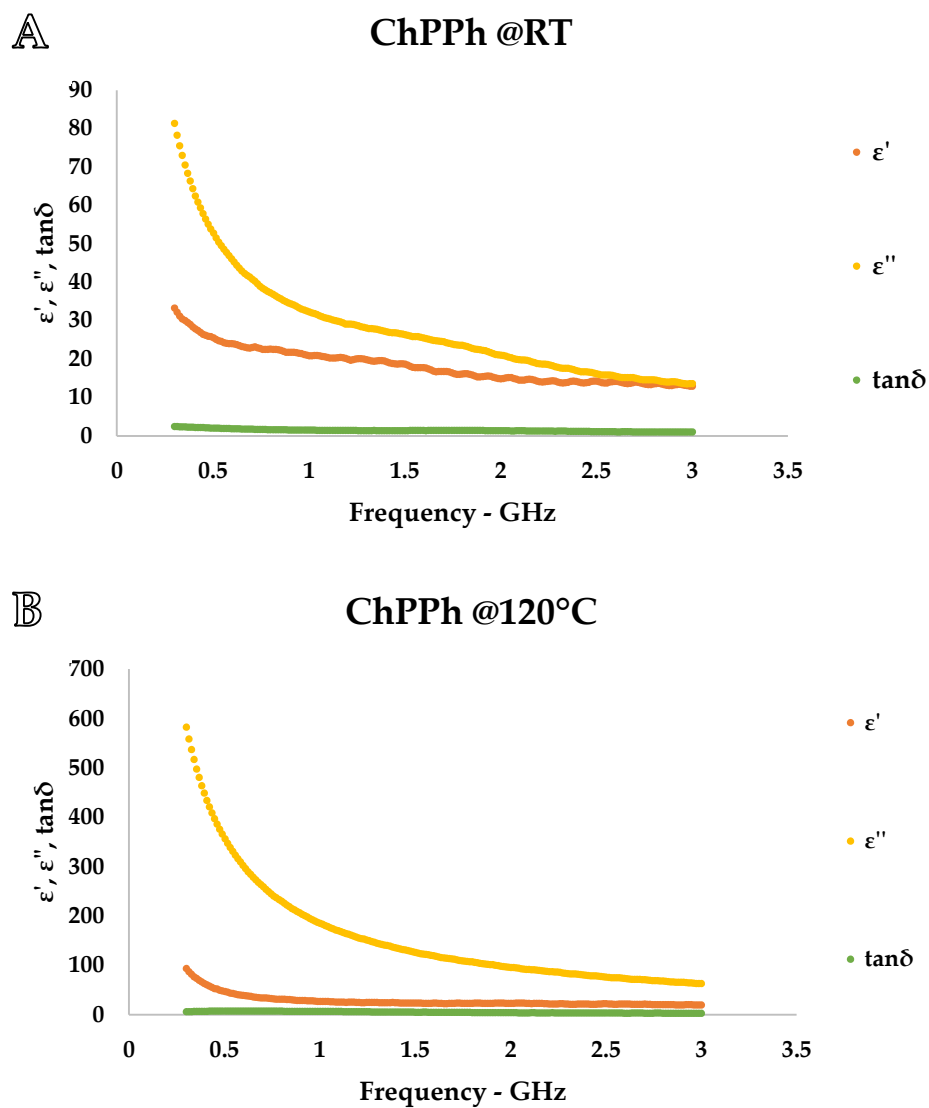

**Figure S11:** ChPPh dielectric properties. Irradiation frequency range: 0.3-3 GHz. Irradiation temperature: A. RT; B. 120 °C. Measurements were performed according to Paragraph 3.3 in the Experimental Section.

## Antioxidant Activity of ChPPh LigDES

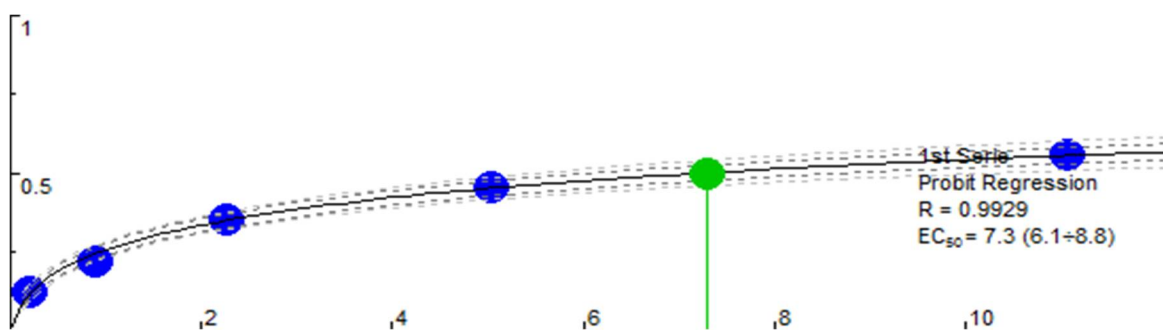

### Probit Regression

$$Y = \text{CumNorm}(0.332142 * \text{Log}(X) - 0.660476)$$

$$R = 0.992903$$

$$\text{EC}_{50} = 7.3048 (6.101 \div 8.805)$$

**Figure S12:** ChPPh “as synthesized” DPPH essay. Probit regression, relative equation and EC<sub>50</sub> value. Measurements were performed according to Paragraph 3.6 in the Experimental Section.

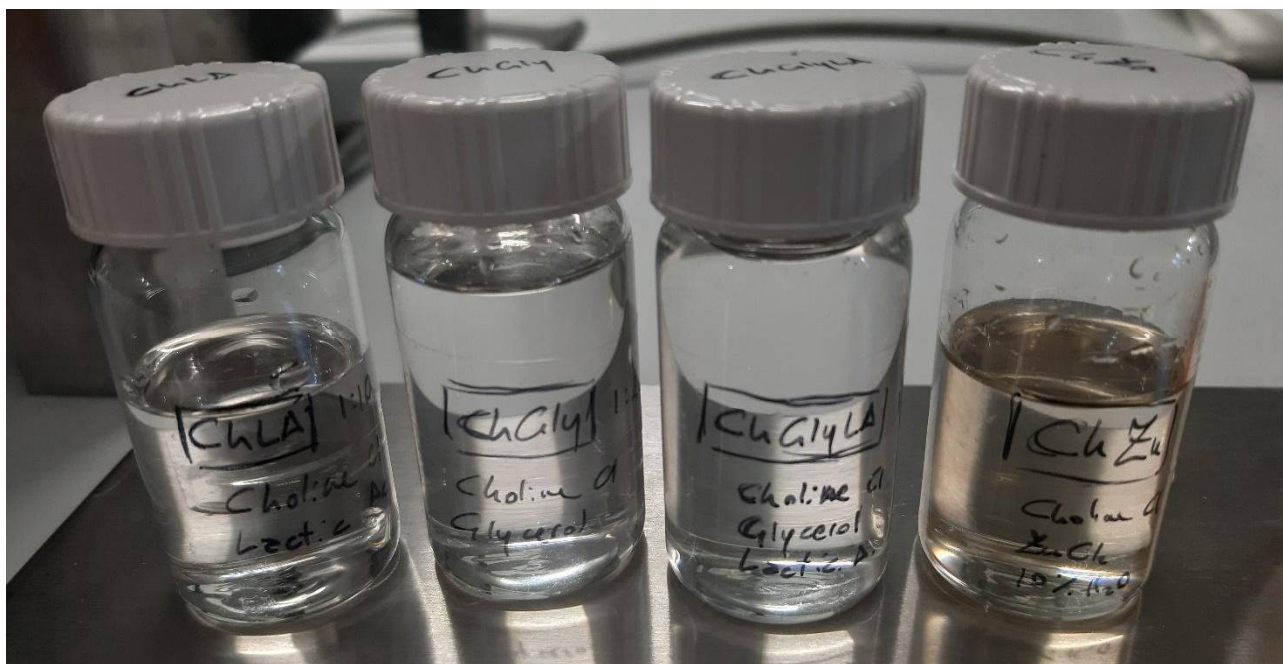

**Figure S13:** Choline based NaDES. HBD from left to right: lactic acid (LA), glycerol (Gly), lactic acid + glycerol (GlyLA), ZnCl<sub>2</sub> (Zn).

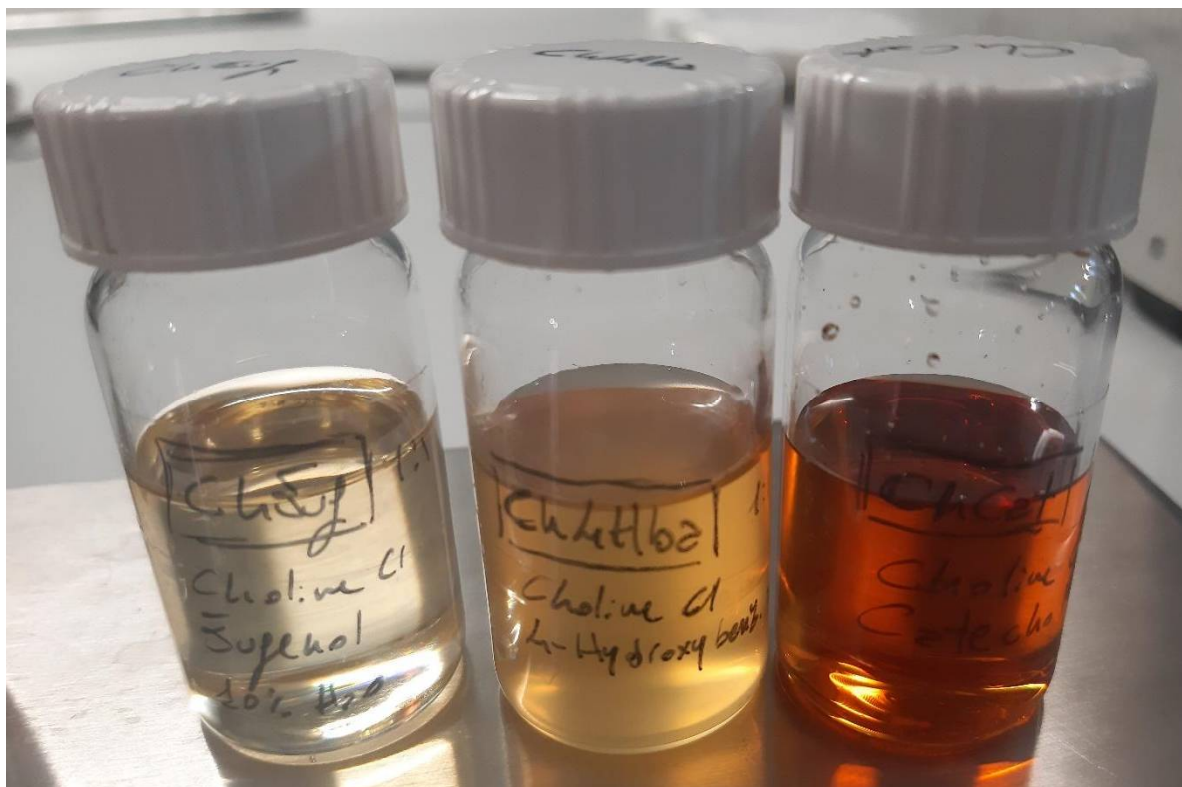

**Figure S14:** Choline based LigDES. HBD from left to right: eugenol (Eug), 4-hydroxybenzyl alcohol (4Hba), catechol (Cat).

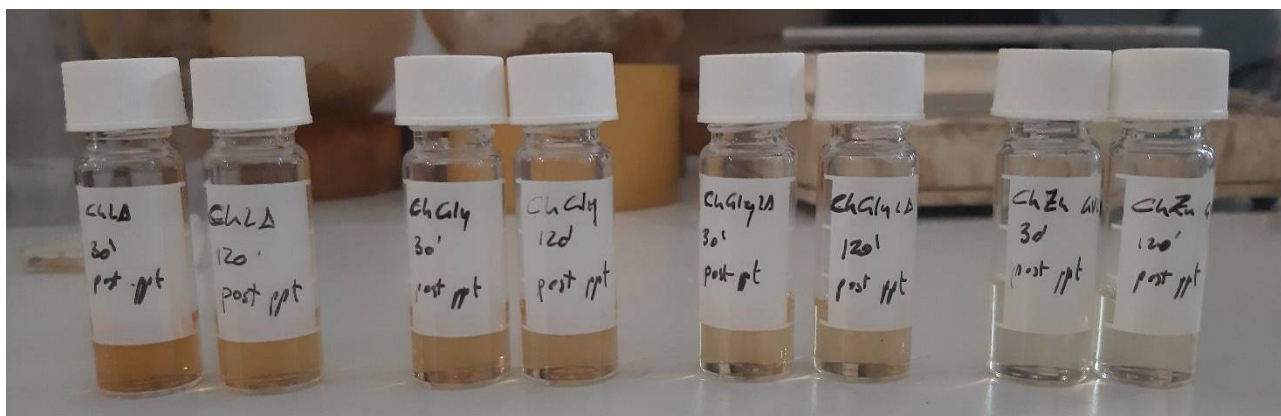

**Figure S15:** Choline based NaDES after lignin precipitation and water excess elimination. From left to right: ChLA 30 min and 120 min, ChGly 30 min and 120 min, ChGlyLA 30 min and 120 min, ChZn 30 min and 120 min.

## References

1. Genevini, P.; Adani, F.; Villa, C.; Rice hull degradation by co-composting with dairy cattle slurry. *Soil Sci. Plant. Nutr.* 1997, 43, 135–147. <https://doi.org/10.1080/00380768.1997.10414722>.
